# Supplementary material for: Fluorophore–quencher complexes (Cu2+/Al3+) of coumarin Schiff bases as chemosensors for the detection of l-glutamic acid and l-arginine: in vitro and in vivo studies
Source: Royal Society of Chemistry journal article supplement (doi:10.1039/d4dt01977f), 2024-01-01
Supplement: d4dt01977f1.pdf [file d4dt01977f1.pdf]

## Supporting Information

### Fluorophore-quencher complexes ( $\text{Cu}^{2+}/\text{Al}^{3+}$ ) of coumarin Schiff bases as chemosensor for the detection of L-glutamic acid and L-arginine: *In vitro* and *in vivo* studies

M. Ranjani,<sup>1</sup>G.A.Thiruppathi,<sup>2</sup>V. Keerthana,<sup>3</sup>M. Ramya,<sup>4</sup> P. Kalaivani,<sup>5</sup>  
S.Selvakumar,<sup>3</sup>R. Shankar,<sup>4</sup>K. Srinivasan,<sup>4</sup> P. Sundararaj<sup>2</sup> and R. Prabhakaran<sup>1\*</sup>

<sup>1</sup>Department of Chemistry, Bharathiar University, Coimbatore 641046, India.

<sup>2</sup>Department of Zoology, Bharathiar University, Coimbatore 641046, India.

<sup>3</sup>Department of Biochemistry, Bharathiar University, Coimbatore 641046, India.

<sup>4</sup>Department of Physics, Bharathiar University, Coimbatore 641046, India.

<sup>5</sup>Department of Chemistry, Nirmala College for Women, Coimbatore 641018, India.

\*Corresponding authors: E.mail: [rpnchemist@gmail.com](mailto:rpnchemist@gmail.com); [rpnchemist@buc.edu.in](mailto:rpnchemist@buc.edu.in)  
(R. Prabhakaran); Fax: +91-4222422387; Tel: +91-422-2428319

## MATERIALS AND METHODS

The inorganic salts and L-amino acids were of chemically pure in grade and obtained from commercial sources and solvents were purified as per reported procedure.<sup>1</sup> RAAGA melting point apparatus were used to find out the melting points of the compounds. IR spectra were recorded as KBr pellets in the 400-4000  $\text{cm}^{-1}$  range with a JASCO FT-IR instrument. The electronic spectra were recorded in the range 200-800nm by using JASCO V-630 UV-Vis spectrometer. The emission spectra were measured using a JASCO FP-6600 instrument at room temperature. The <sup>1</sup>H-NMR studies were carried out in DMSO-*d*<sup>6</sup> by using Bruker 400 MHz instrument with TMS (tetramethylsilane) as standard. The unit cell refinement, crystal data corrections and collections for **RR1** and **RR2** were done at 296 (2) K using SAINT V8.27B and a graphite monochromator with MoK $\alpha$  radiation ( $\lambda = 0.71073\text{\AA}$ ).<sup>2</sup> The structure was solved by SHELXT<sup>45</sup> direct method, which was refined by full-matrix least-squares on  $F^2$  with anisotropic displacement parameters for the non-H atoms using SHELXL-2016/6.<sup>3</sup> The Structural identification was performed by the programs PLATON,<sup>4</sup> OLEX2,<sup>5</sup> and WinGX.<sup>6,7</sup>

### General procedure for preparation of stock solutions

The colorimetric experiments of **RR1** and **RR2** with various cations were investigated in ethanol:water (1:4 v/v) at 10  $\mu\text{M}$  concentration. The solution of **RR1/ RR2** and various cations (chloride salts) such as  $\text{Al}^{3+}$ ,  $\text{Ca}^{2+}$ ,  $\text{Co}^{2+}$ ,  $\text{Cr}^{3+}$ ,  $\text{Fe}^{2+}$ ,  $\text{Cu}^{2+}$ ,  $\text{Mn}^{2+}$ ,  $\text{Ni}^{2+}$ ,  $\text{Zn}^{2+}$ ,  $\text{Hg}^{2+}$ ,  $\text{K}^+$  and  $\text{Na}^+$  were

prepared separately using ethanol:water (1:4 v/v) at 10  $\mu$ M concentration. To each 10  $\mu$ M concentration of **RR1** and **RR2** solution, different cations were added separately and for these solutions, fluorescence and absorption spectra were recorded. For fluorescence study, the excitation wavelength was 310 nm for **RR1** and 350 nm for **RR2** with excitation slit of 2.5 nm and emission slit of 5 nm. The fluorescence and absorption titrations were carried out for **RR1** and **RR2** with  $\text{Cu}^{2+}$  and  $\text{Al}^{3+}$  ions (chloride salts) at 10  $\mu$ M concentration in ethanol:water medium. Job's plot was plotted against **RR1** and **RR2** versus mole fraction of  $\text{Cu}^{2+}$  and  $\text{Al}^{3+}$  ions respectively.

10  $\mu$ M solution of **RR1-Cu<sup>2+</sup>** and **RR2-Al<sup>3+</sup>** with various L-amino acids such as (Alanine (Ala), Valine (Val), Asparagine (Aspara), Leucine (Leu), Aspartic acid (Asp), Arginine (Arg), Glutamic acid (Glu), Histidine (His), Phenylalanine (Phenylala), Proline (Pro), Methionine (Met) and Threonine (Thr)) in ethanol:water (1:4 v/v) were prepared and investigated. To each **RR1-Cu<sup>2+</sup>** and **RR2-Al<sup>3+</sup>** solution, various L-amino acids were added separately and fluorescence and absorption spectra were recorded. For fluorescence study, the excitation wavelength was 320 nm for **RR1-Cu<sup>2+</sup>** and 390 nm for **RR2-Al<sup>3+</sup>** with excitation slit of 2.5 nm and emission slit of 5 nm. The fluorescence and absorption titrations were carried out for **RR1-Cu<sup>2+</sup>** with L-arginine and **RR2-Al<sup>3+</sup>** with L-glutamic acid at 10  $\mu$ M concentration in ethanol:water (1:4 v/v). Job's plot was plotted against **RR1-Cu<sup>2+</sup>** versus L-arginine and **RR2-Al<sup>3+</sup>** versus L-glutamic acid.

### **Live cell imaging studies**

## **MATERIALS AND METHODS**

### **Maintenance of *C. elegans***

Wild-type *C. elegans* strain was grown and maintained on nematode growth media agar plates seeded with *E. coli* strain OP50 at 20°C according to the standardized protocol (Brenner, 1974).<sup>8</sup> To obtain age-synchronized worm populations, culture plates with eggs and gravid hermaphrodites were washed with M9 buffer (6 g  $\text{Na}_2\text{HPO}_4$ , 3 g  $\text{KH}_2\text{PO}_4$ , 5 g  $\text{NaCl}$ , 0.25 g  $\text{MgSO}_4 \cdot 7\text{H}_2\text{O}$  and 1 L deionized water) and exposed to alkaline hypochlorite (1 mL of 5M  $\text{NaOH}$  and 1 mL of household bleach) followed by multiple washes with buffer solution. The gathered eggs were incubated in M9 buffer at 20°C overnight to favor hatching.<sup>9</sup>

## **Fluorescence microscopy and image processing**

Age-synchronized young adult worms (30-35 worms/treatment) were exposed to 1 mL PBS buffer solution containing 10  $\mu$ M compounds for 5 h. After exposure, the worms were washed off from the plates, anesthetized with sodium azide, and mounted on to 2 % agarose padded microscopic slides. Photomicrographs of immobilized live worms were captured using an upright fluorescence microscope (CX43, Olympus, Japan). The captured images were analyzed for fluorescence signals using ImageJ freeware (NIH, Bethesda, MD) by determining the mean pixel intensity, and the acquired data were subjected to one-way analysis of variance (ANOVA) followed by Bonferroni's posthoc test (SPSS 17, IBM Corporation, NY). Results are presented as the mean  $\pm$  standard deviation (SD) of three independent biological trials, each performed in triplicate under similar conditions as described.<sup>10</sup>

## **Cytotoxicity studies**

### **3-(4,5-Dimethylthiazol-2-yl)-2,5-diphenyltetrazolium bromide (MTT) assay<sup>11</sup>**

The cells were cultured ( $1 \times 10^4$  cells/well) with or without the drug (10  $\mu$ M to 200  $\mu$ M) for 24h. Then, plated cells were incubated with 3-(4, 5-dimethylthiazol-2-yl)-2,5-diphenyltetrazolium bromide (MTT, Sigma-Aldrich, 0.5 mg/ml) for 4 h at 37°C. After incubation, the plates were placed for 25 min at room temperature with shaking to achieve the complete dissolution of formazon and the absorbance was measured at 570nm using a UV spectrophotometric plate reader (Multiskan Go, ThermoScientific).

## **Confocal Microscopic Imaging**

### **Detection of ROS generation and mitochondrial membrane potential ( $\Delta\Psi_m$ )<sup>11</sup>**

Cultured cells ( $5 \times 10^5$ ) were seeded on a glass cover slips (0.17mm thickness) in a six-well plate and allowed to attach overnight as previously described.<sup>12</sup> On the next day, medium was replaced with fresh medium containing the IC50 concentration of the compound and incubated for 24 h. At the end of incubation, the cover slips were removed from the culture plate and stained with 10  $\mu$ M DCFH-DA (Sigma-Aldrich) for 30 min to detect the ROS generation. Further coverslips were co-stained with nuclear stain DAPI (Sigma-Aldrich). To remove extra dye, the stained cover slips were washed with  $1 \times$  PBS and fixed on a microscopic glass slide with fluro-shield,

(Sigma-Alrich). The fluorescent images were captured using a 40× objective under a laser scanning advanced confocal microscope (DST-PURSE (Phase-II), Bharathiar University).

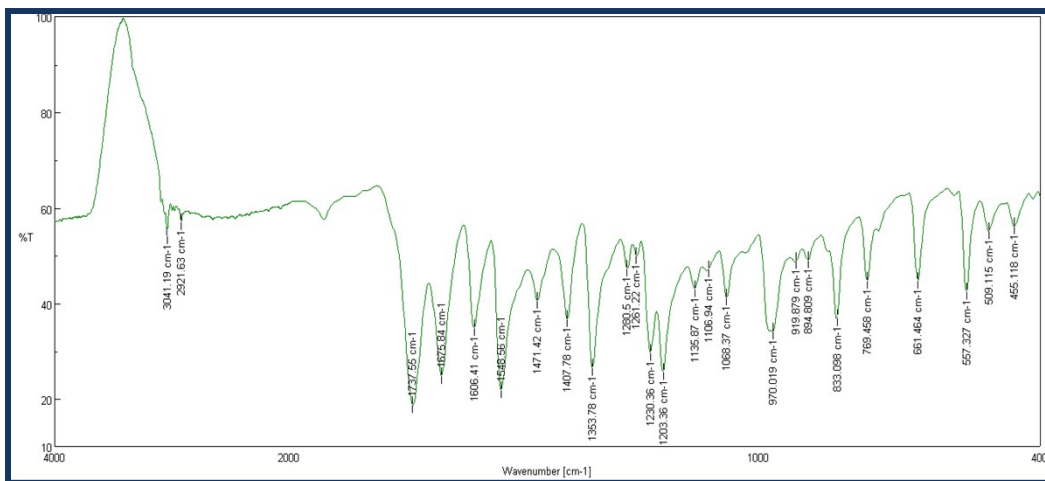

**Fig.S1 FT-IR spectrum of Probe (RR1).**

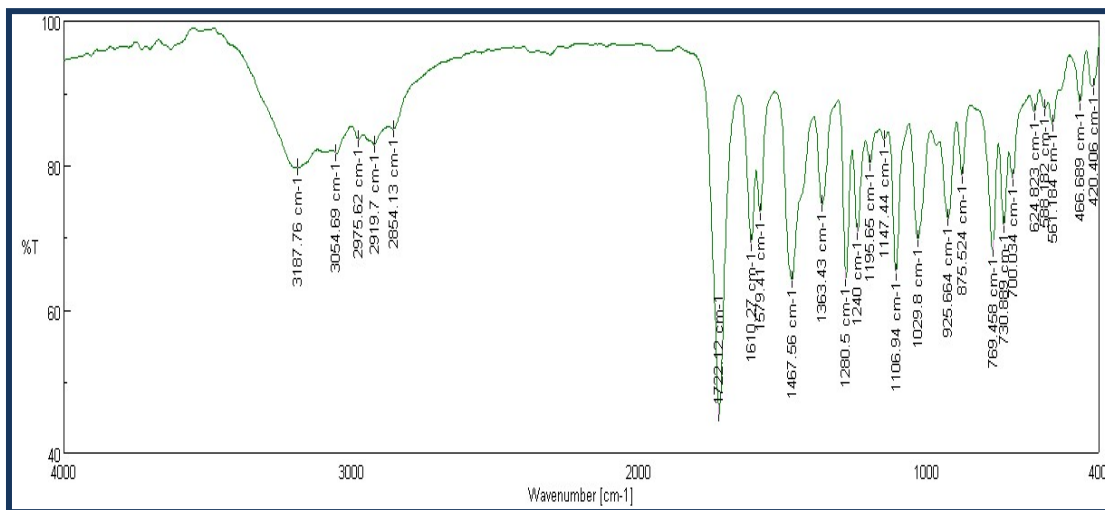

**Fig.S2 FT-IR spectrum of Probe (RR2).**

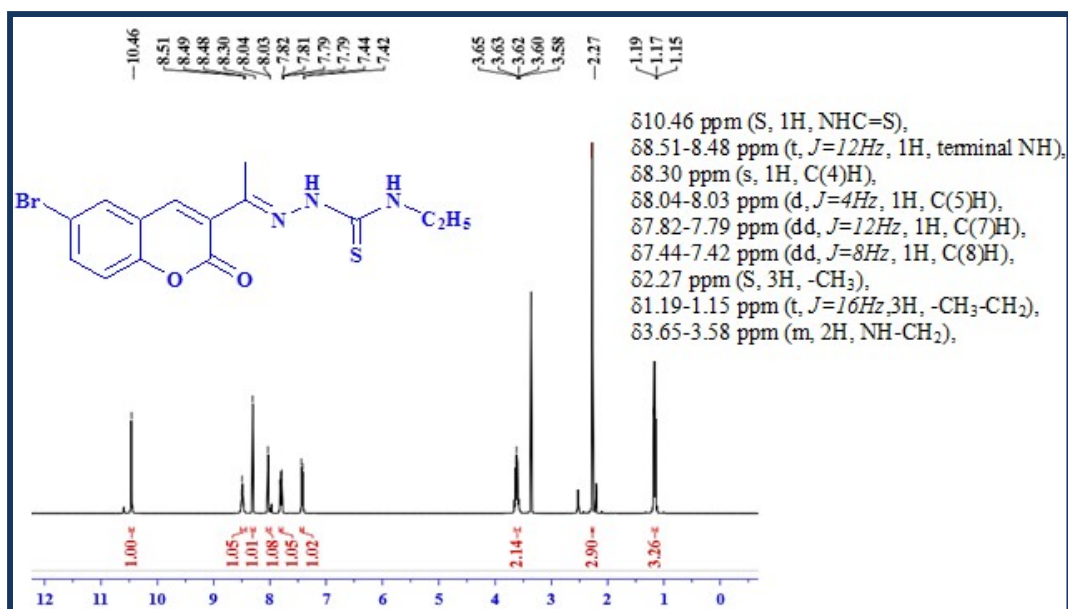

Fig.S3<sup>1</sup>H NMR spectrum of the probe RR1.

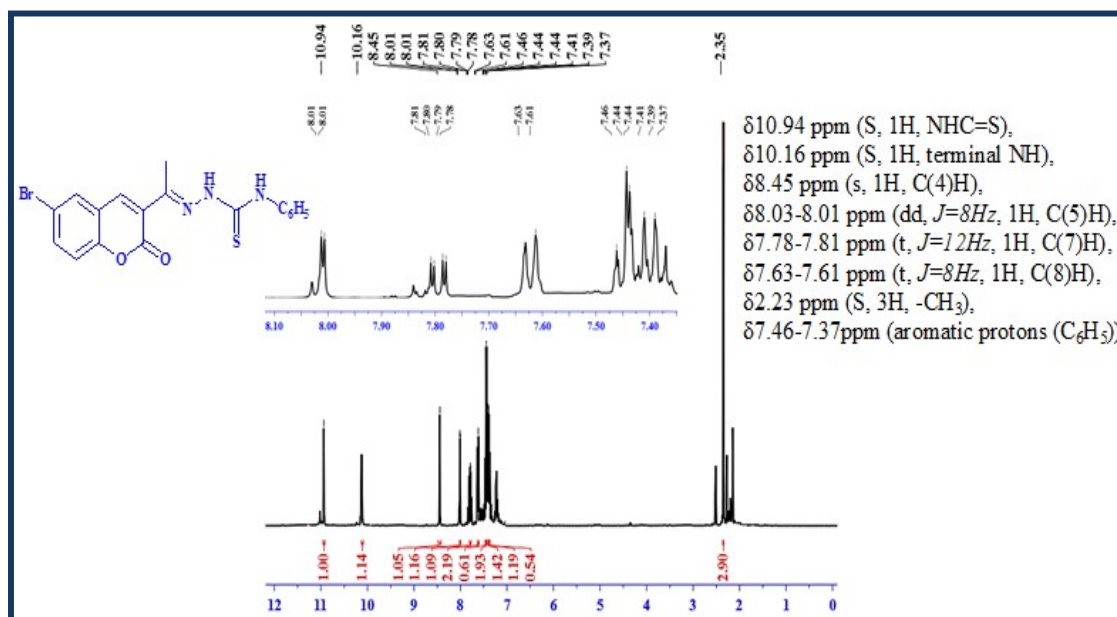

Fig.S4<sup>1</sup>H NMR spectrum of the probe RR2.

**Table S1** Crystallographic data of **RR1** and **RR2**

| <b>Identification code</b>        | <b>RR1</b>                                                        | <b>RR2</b>                                                        |
|-----------------------------------|-------------------------------------------------------------------|-------------------------------------------------------------------|
| Empirical formula                 | C <sub>14</sub> H <sub>14</sub> BrN <sub>3</sub> O <sub>2</sub> S | C <sub>18</sub> H <sub>14</sub> BrN <sub>3</sub> O <sub>2</sub> S |
| Formula weight                    | 368.25                                                            | 416.29                                                            |
| Temperature                       | 296(2) K                                                          | 296(2)K                                                           |
| Wavelength                        | 0.71073 Å                                                         | 0.71073Å                                                          |
| Crystal system                    | triclinic                                                         | monoclinic                                                        |
| Space group                       | P -1                                                              | P 1 21/c 1                                                        |
| Unit cell dimensions              |                                                                   |                                                                   |
| a                                 | 8.059(9)Å                                                         | 6.886(3) Å                                                        |
| b                                 | 10.617(12)Å                                                       | 12.995(5) Å                                                       |
| c                                 | 10.658(12)Å                                                       | 19.157(7) Å                                                       |
| α                                 | 104.79(3)°                                                        | 90°                                                               |
| β                                 | 109.44(3)°                                                        | 93.108(11)°                                                       |
| γ                                 | 106.26(2)°                                                        | 90°                                                               |
| Volume                            | 761.9(14)Å <sup>3</sup>                                           | 1711.7(11) Å <sup>3</sup>                                         |
| Z                                 | 2                                                                 | 4                                                                 |
| Density                           | 1.605 Mg/m <sup>3</sup>                                           | 1.615 Mg/m <sup>3</sup>                                           |
| Absorption coefficient            | 2.842mm <sup>-1</sup>                                             | 2.541 mm <sup>-1</sup>                                            |
| F(000)                            | 372                                                               | 840                                                               |
| θ range for data collection       | 2.19 to 27.11°                                                    | 2.64 to 27.19°                                                    |
| Limiting indices                  | -10≤h≤10,<br>-13≤k≤13,<br>-13≤l≤13                                | -8 ≤ h ≤ 8,<br>-16 ≤ k ≤ 16,<br>-24 ≤ l ≤ 24                      |
| Reflections collected             | 4909                                                              | 101740                                                            |
| Independent reflections           | 2596 [R(int) = 0.1049]                                            | 3800 [R(int) = 0.0466]                                            |
| Refinement method                 | Full-matrix least-squares on F <sup>2</sup>                       | Full-matrix least-squares on F <sup>2</sup>                       |
| Data/restraints/ parameters       | 2596 / 0 / 192                                                    | 3800 / 0 / 236                                                    |
| Goodness-of-fit on F <sup>2</sup> | 1.003                                                             | 1.019                                                             |
| Final R indices [I>2σ(I)]         | R1 = 0.0816, wR2 = 0.1574                                         | R1 = 0.0329, wR2 = 0.0766                                         |
| R indices (all data)              | R1 = 0.2200, wR2 = 0.2062                                         | R1 = 0.0494, wR2 = 0.0838                                         |

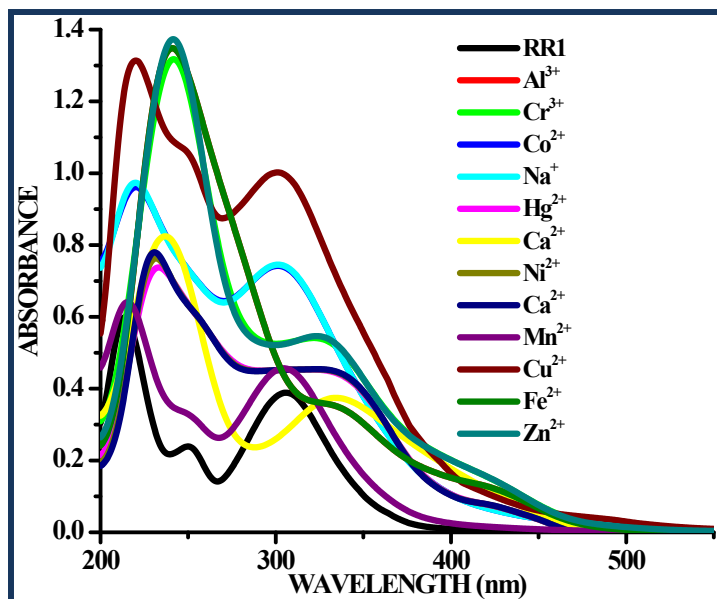

**Fig.S5** UV-Vis spectra of probe RR1 in the presence of different cations at 10 μM concentration in ethanol:water (1:4 v/v).

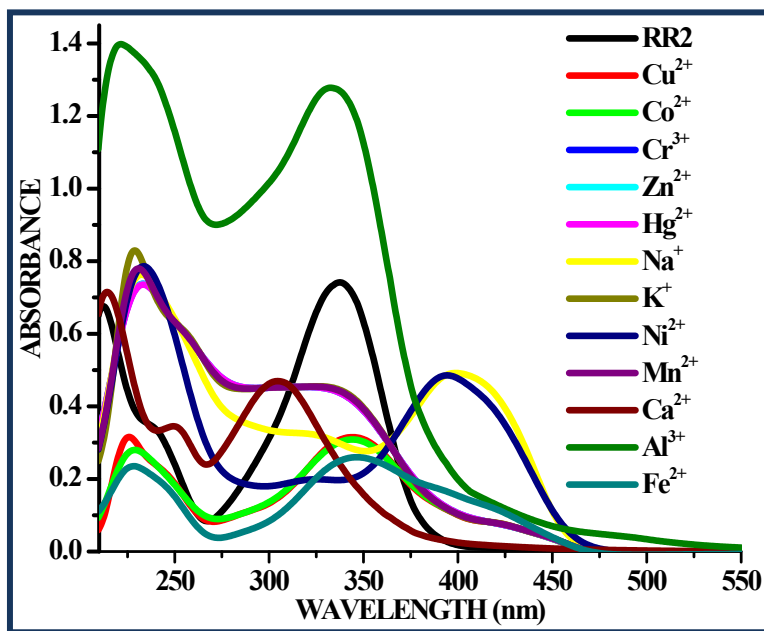

**Fig.S6** UV-Vis spectra of probe RR2 in the presence of different cations at 10 μM concentration in ethanol:water (1:4 v/v).

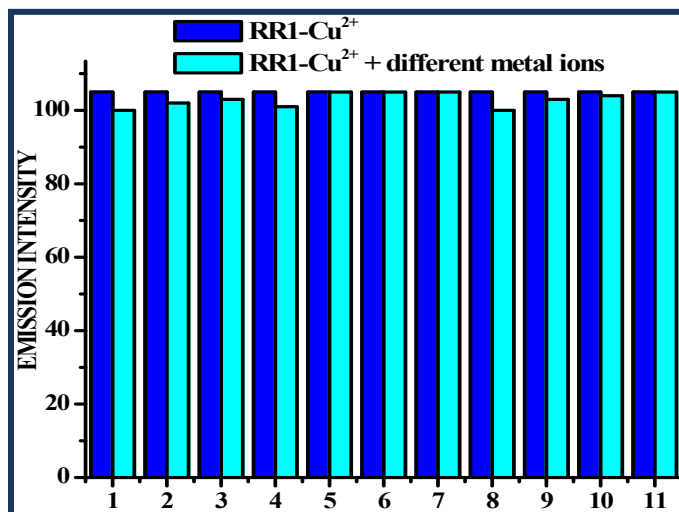

(Fig. S7A) Emission spectra of RR1-Cu<sup>2+</sup>(1 equiv.)with various metal ions (1 equiv.)1- Al<sup>3+</sup>; 2- Hg<sup>2+</sup>; 3- Fe<sup>2+</sup>; 4- Ni<sup>2+</sup>; 5-Na<sup>+</sup>; 6- Co<sup>2+</sup>; 7- Cu<sup>2+</sup>; 8- Ca<sup>2+</sup>; 9- K<sup>+</sup>; 10- Mn<sup>2+</sup>and 11- Cr<sup>3+</sup>.

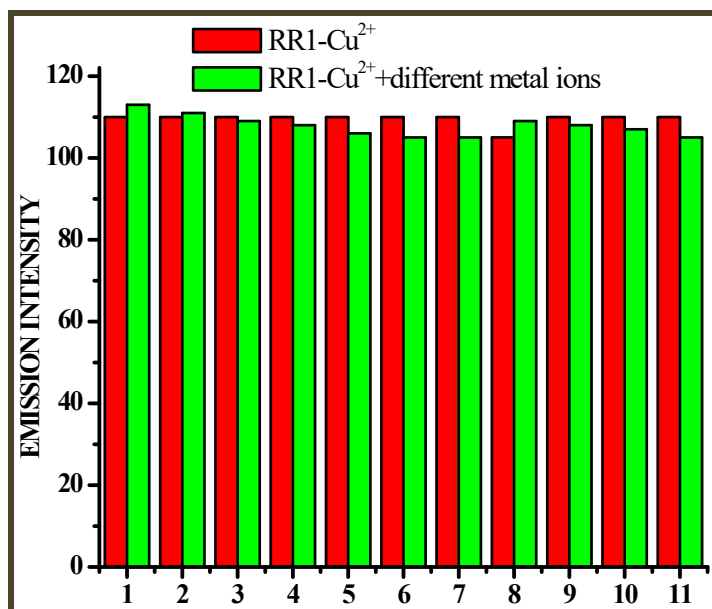

(Fig. S7B) Emission spectra of RR1-Cu<sup>2+</sup>(5 equiv.)with various metal ions (5 equiv.)1- Al<sup>3+</sup>; 2- Hg<sup>2+</sup>; 3- Fe<sup>2+</sup>; 4- Ni<sup>2+</sup>; 5-Na<sup>+</sup>; 6- Co<sup>2+</sup>; 7- Cu<sup>2+</sup>; 8- Ca<sup>2+</sup>; 9- K<sup>+</sup>; 10- Mn<sup>2+</sup>and 11- Cr<sup>3+</sup>.



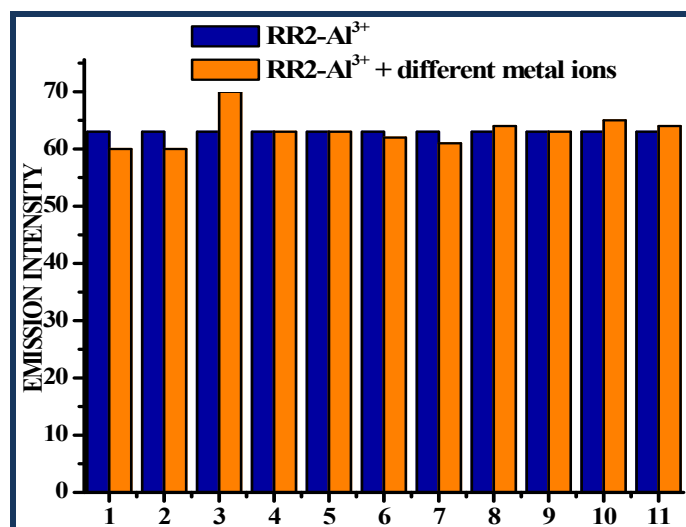

(Fig. S8A) Emission spectra of RR2-Al<sup>3+</sup>(1 equiv.)with various metal ions (1 equiv.)1- Cu<sup>2+</sup>; 2- Hg<sup>2+</sup>; 3- Fe<sup>2+</sup>; 4- Mn<sup>2+</sup>; 5-K<sup>+</sup>; 6- Ca<sup>2+</sup>; 7- Cu<sup>2+</sup>; 8- Co<sup>2+</sup>; 9- Cr<sup>3+</sup>; 10- Ni<sup>2+</sup>and 11- Na<sup>+</sup>.

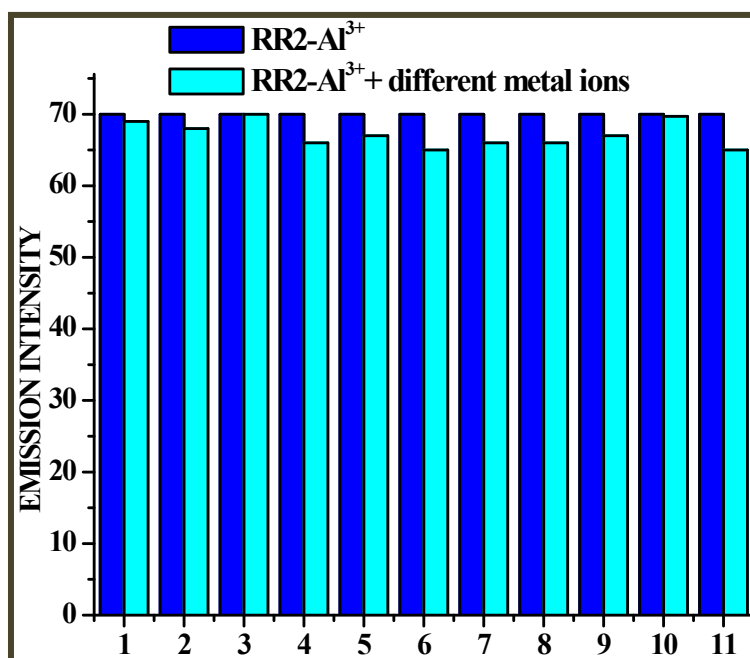

(Fig. S8B) Emission spectra of RR2-Al<sup>3+</sup>(5 equiv.)with various metal ions (5 equiv.)1- Cu<sup>2+</sup>; 2- Hg<sup>2+</sup>; 3- Fe<sup>2+</sup>; 4- Mn<sup>2+</sup>; 5-K<sup>+</sup>; 6- Ca<sup>2+</sup>; 7- Cu<sup>2+</sup>; 8- Co<sup>2+</sup>; 9- Cr<sup>3+</sup>; 10- Ni<sup>2+</sup>and 11- Na<sup>+</sup>.

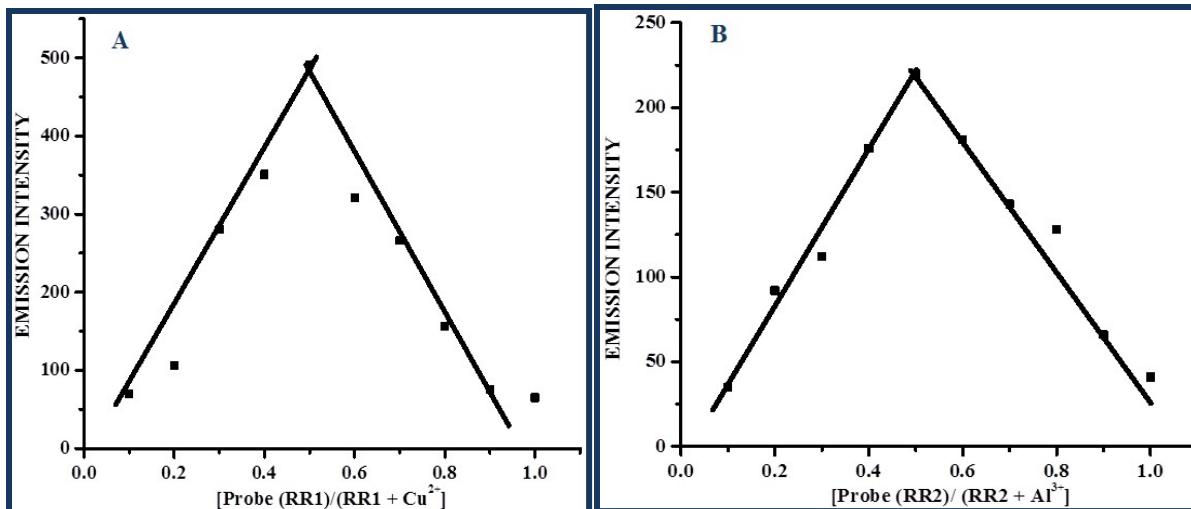

**Fig. S9** Job's plot analysis **A**) probe (RR1) / [probe (RR1)+ $\text{Cu}^{2+}$  ion] and **B**) probe (RR2) / [probe (RR2)+ $\text{Al}^{3+}$  ion]

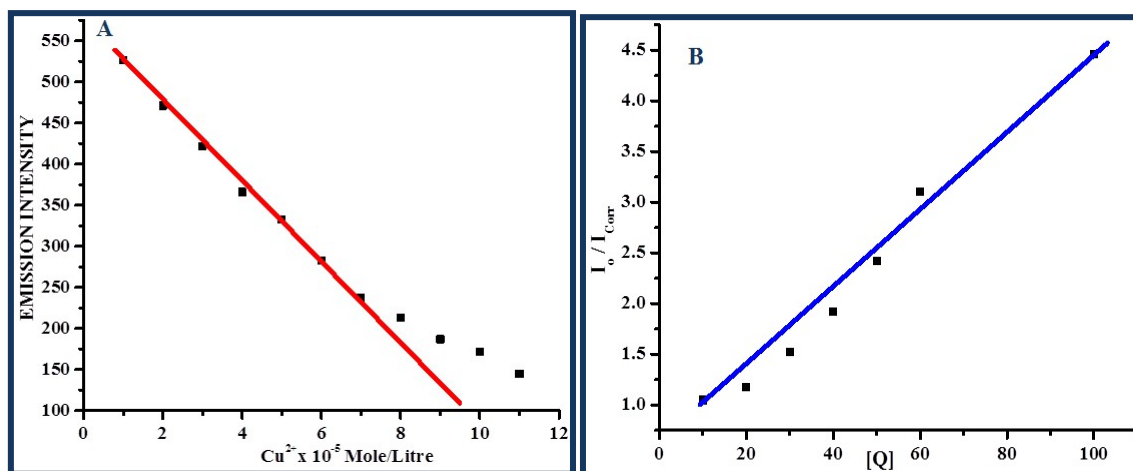

**Fig.S10A**) Limit of Detection (LOD) plot and **B**) Stern-Volmer plot of RR1 with  $\text{Cu}^{2+}$  ions at 10  $\mu\text{M}$  concentration ( $R^2 = 0.9840$ ).

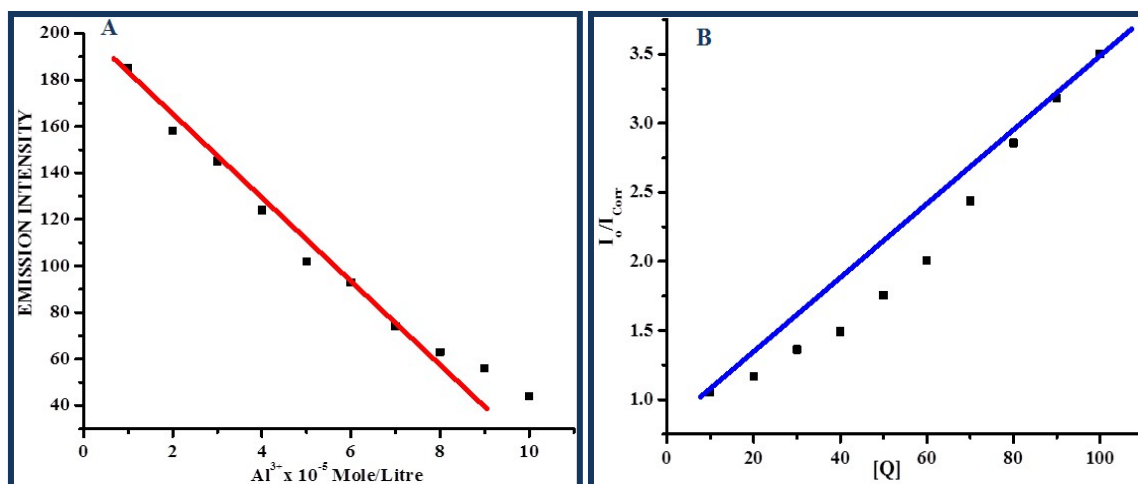

**Fig.S11A)** Limit of Detection (LOD) plot and **B)** Stern-Volmer plot of **RR2** with  $Al^{3+}$  ions at  $10 \mu M$  concentration ( $R^2 = 0.9671$ ).

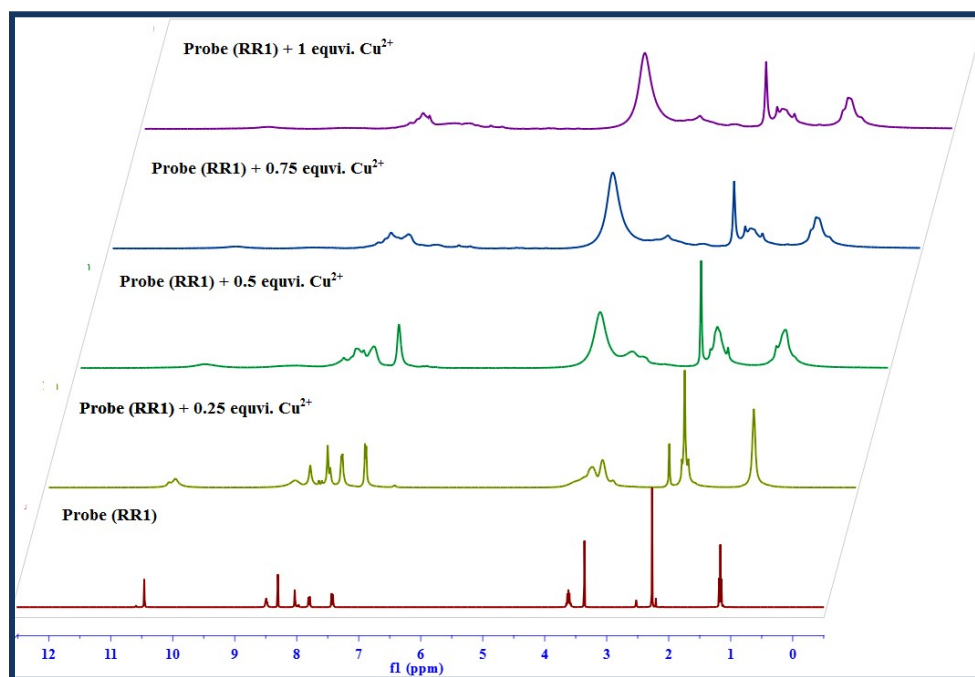

**Fig.S12**  $^1H$ -NMR titration spectra of probe **RR1** (1 equiv.) with addition of different concentrations of  $Cu^{2+}$  ion using  $DMSO-d_6$  solvent.

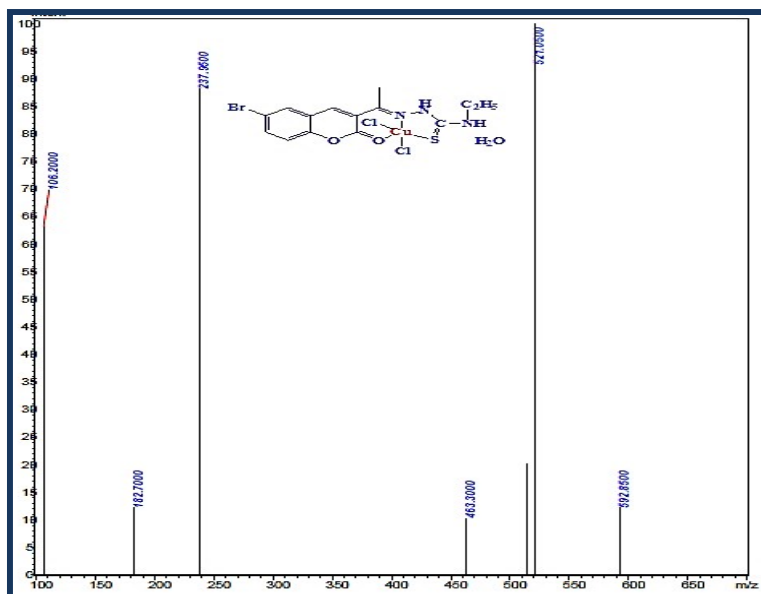

**Fig.S13** Mass spectrum of RR1-Cu<sup>2+</sup>.

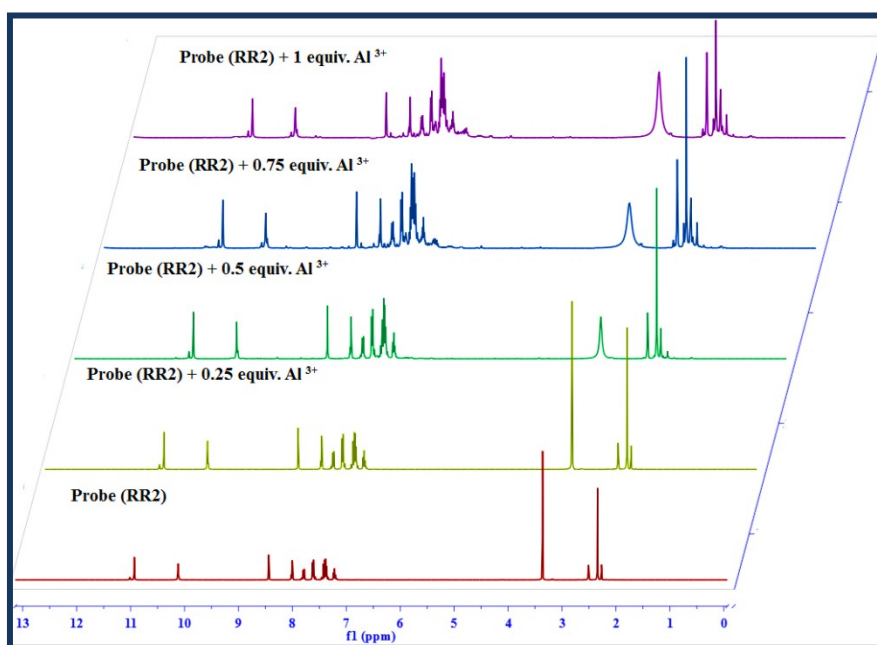

**Fig.S14** <sup>1</sup>H-NMR titration spectra of probe RR2 (1 equiv.) with addition of different concentrations of Al<sup>3+</sup> ion using DMSO-d<sub>6</sub> solvent.

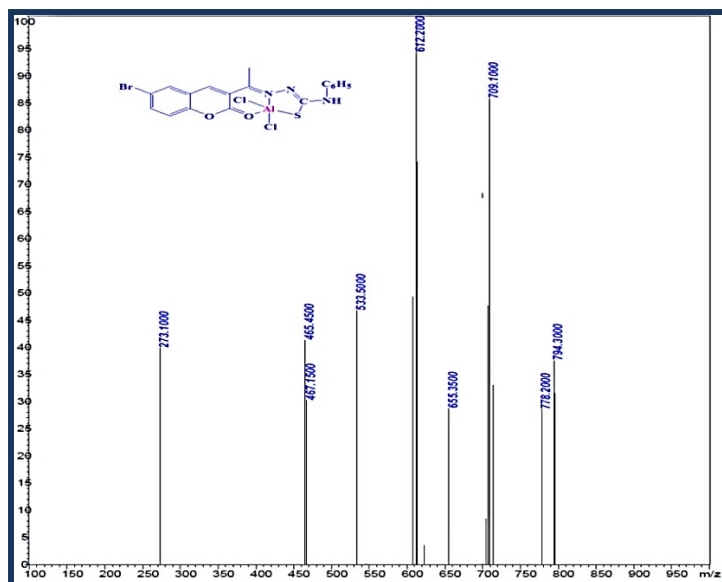

Fig.S15 Mass spectrum of RR2-Al<sup>3+</sup>.

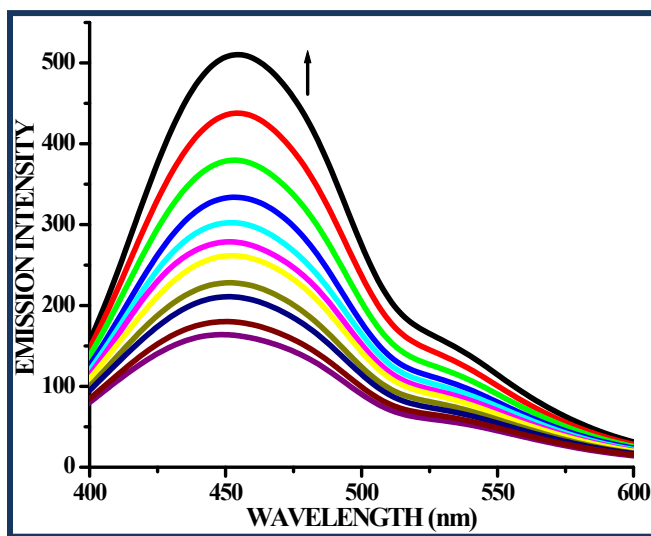

Fig. S16 Changes in emission spectra of RR1-Cu<sup>2+</sup> by increasing the concentration level of L-arginine in ethanol:water (1:4 v/v).

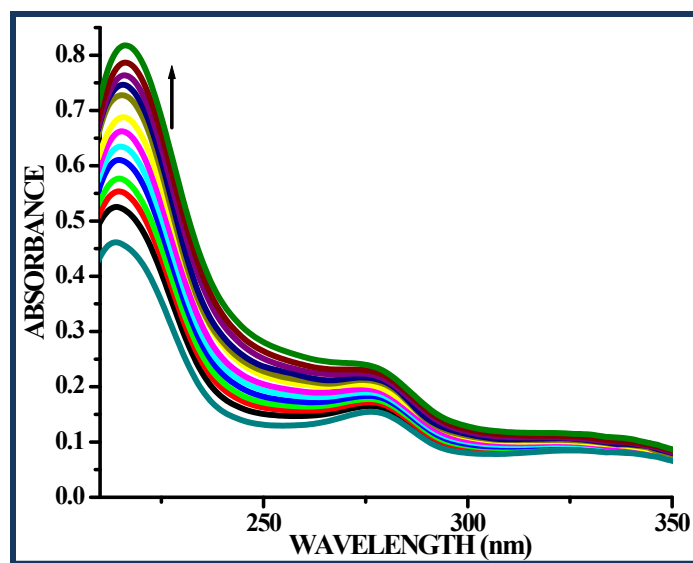

**Fig. S17** UV-Vis spectra probe RR1-Cu<sup>2+</sup> upon addition of L-arginine at 10 μM concentration in ethanol:water (1:4 v/v).

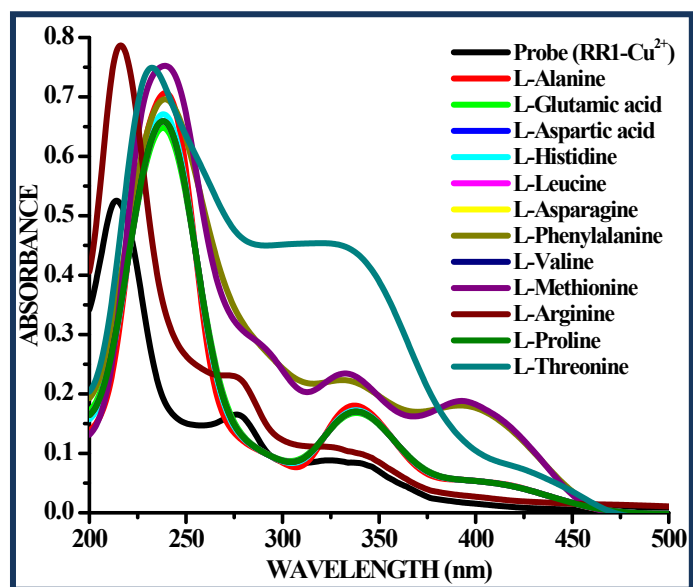

**Fig.S18** UV-Vis spectra of RR1-Cu<sup>2+</sup> in the presence of different L-amino acids at 10 μM concentration in ethanol:water (1:4 v/v).

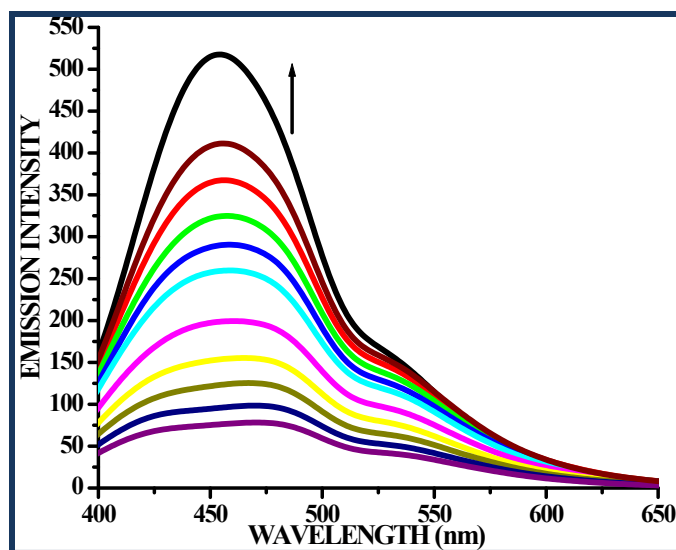

**Fig. S19** Changes in emission spectra of  $RR2-Al^{3+}$  upon addition of L-glutamic acid at  $10\ \mu M$  concentration in ethanol:water (1:4 v/v).

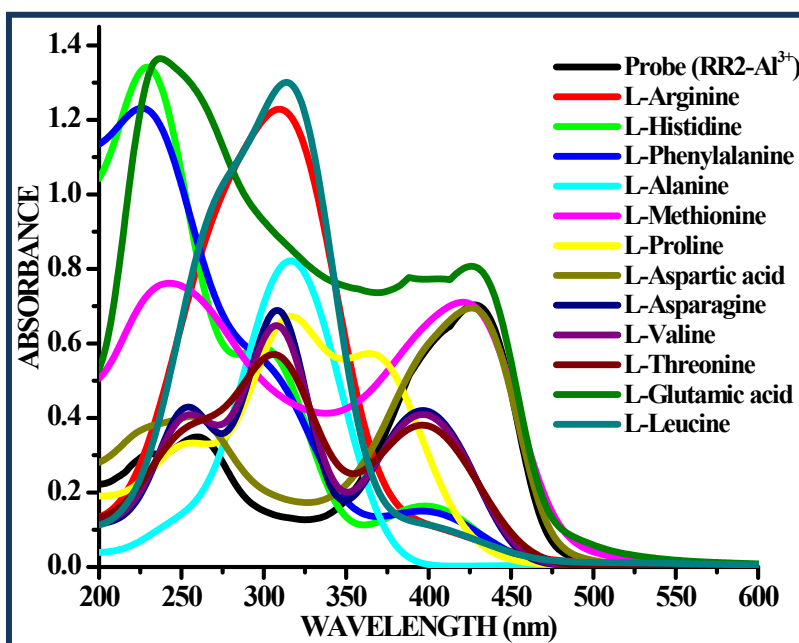

**Fig.S20** UV-Vis spectra of  $RR2-Al^{3+}$  in the presence of different L-amino acids at  $10\ \mu M$  concentration in ethanol:water (1:4 v/v).

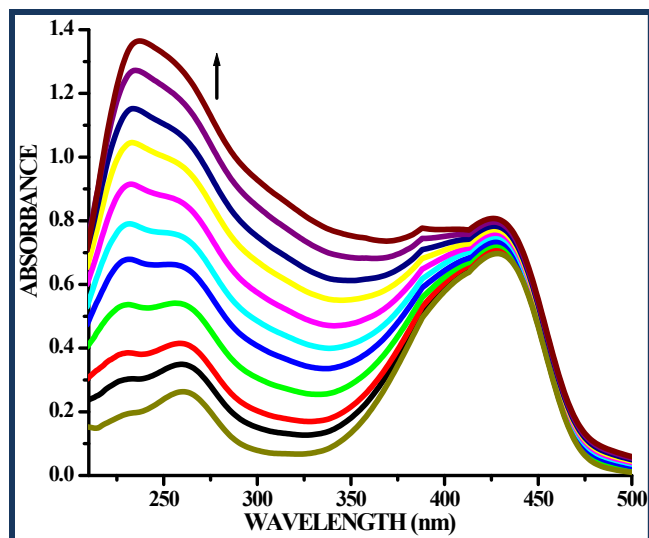

**Fig. S21** UV-Vis spectra of probe **RR2-Al<sup>3+</sup>** upon addition of L-glutamic acid at 10  $\mu$ M concentration in ethanol:water (1:4 v/v).

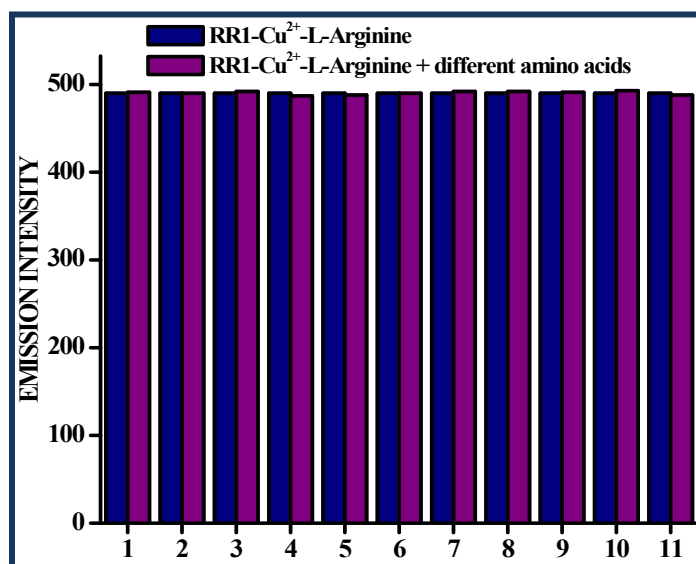

**Fig. S22** Emission spectrum of **RR1-Cu<sup>2+</sup>-L-arginine** (1 equiv.) with various amino acids (1 equiv.) 1-L-Aspartic acid; 2-L-Alanine; 3-L-Methionine; 4-L-Glutamic acid; 5-L-Valine; 6-L-Asparagine; 7- L-Leucine; 8-L-Proline; 9-L-Phenylalanine; 10-L-Threonine and 11-L-Histidine.



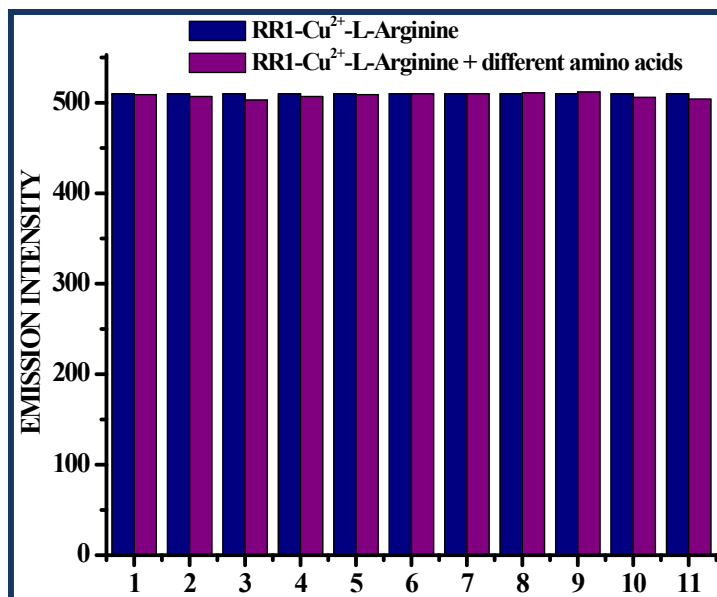

**Fig.S23** Emission spectra of **RR1-Cu<sup>2+</sup>-L-arginine**(5 equiv.)with various amino acids (5 equiv.)1- L-Aspartic acid; 2- L-Alanine; 3- L-Methionine; 4- L-Glutamic acid; 5-L-Valine; 6- L-Asparagine;7- L-Leucine; 8- L-Proline; 9- L-Phenylalanine; 10- L-Threonine and 11- L-Histidine.

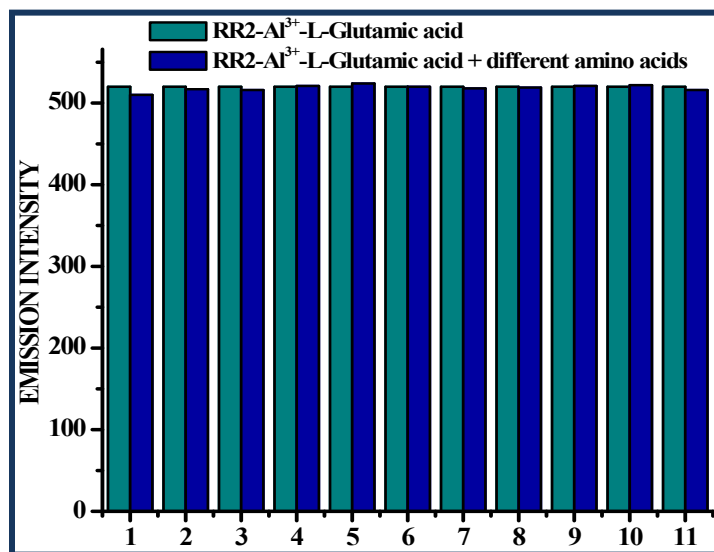

**Fig. S24** Emission spectra of **RR2-Al<sup>3+</sup>-L-glutamic acid**(1 equiv.) with various amino acids (1 equiv.)1-L-Alanine;2-L-Histidine 3-L-Phenylalanine; 4-L-Aspartic acid; 5-L-Valine; 6-L-Threonine;7-L-Methionine; 8-L-Proline; 9-L-Leucine; 10-L-Asparagine and 11-L-Arginine.

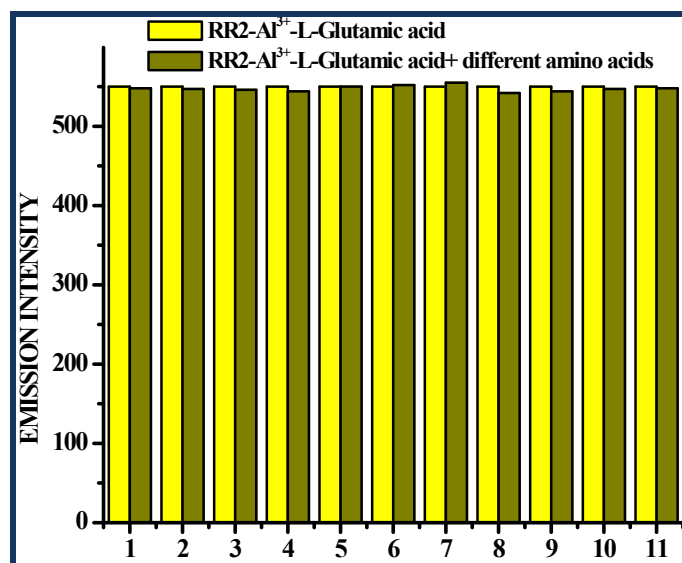

**Fig.S25** Emission spectra of  $RR2-Al^{3+}$ -L-glutamic acid (5 equiv.) with various amino acids (5 equiv.) 1- L-Alanine; 2- L-Histidine 3- L-Phenylalanine; 4- L-Aspartic acid; 5- L-Valine; 6- L-Threonine; 7- L-Methionine; 8- L-Proline; 9- L-Leucine; 10- L-Asparagine and 11- L-Arginine.

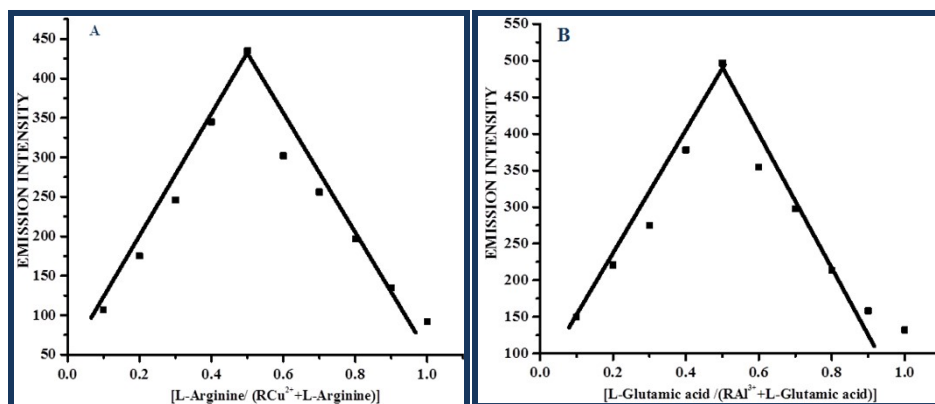

**Fig.S26** A) Job's plot of  $RR1-Cu^{2+}$  and ( $RR1-Cu^{2+}$ -L-arginine) and B) Job's plot of  $RR2-Al^{3+}$  and ( $RR2-Al^{3+}$ -L-glutamic acid).

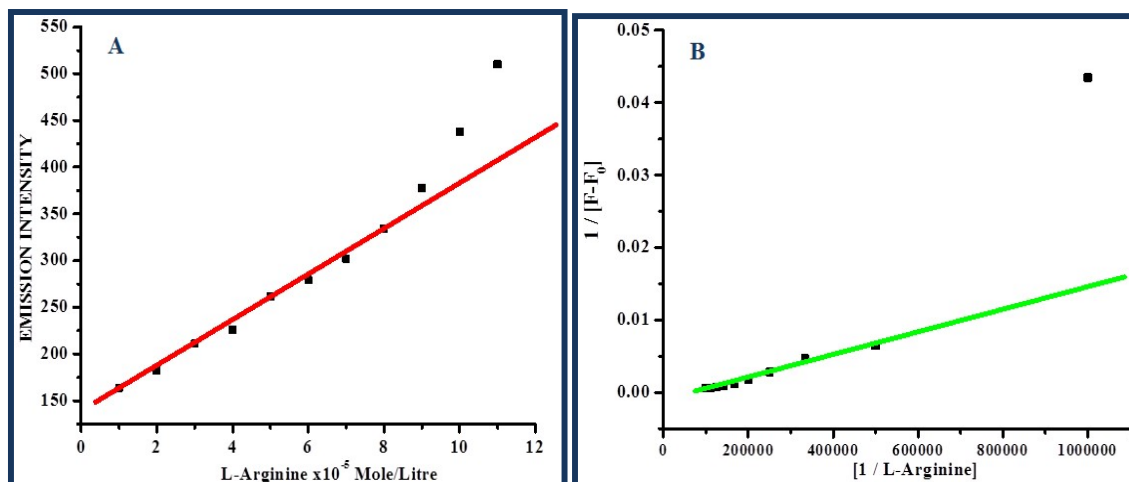

**Fig.S27A)** Limit of Detection (LOD) plot and **B)** Benesi-Hildebrand (B-H) plot ( $R^2 = 0.9730$ ) of **RR1-Cu<sup>2+</sup>** with L-arginine ( $R^2 = 0.9730$ ).

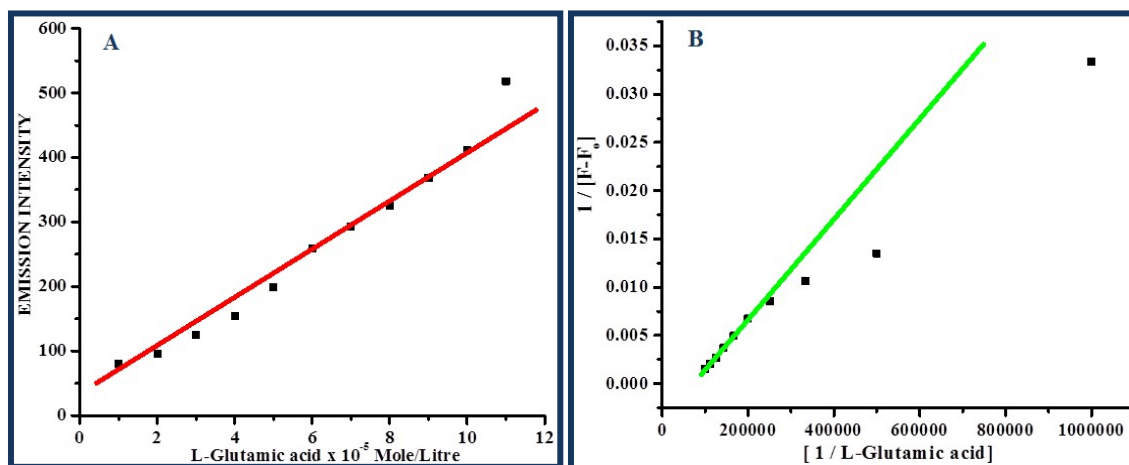

**Fig.S28A)** Limit of Detection (LOD) plot and **B)** Benesi-Hildebrand (B-H) plot ( $R^2 = 0.9968$ ) of **RR2-Al<sup>3+</sup>** with L-glutamic acid.

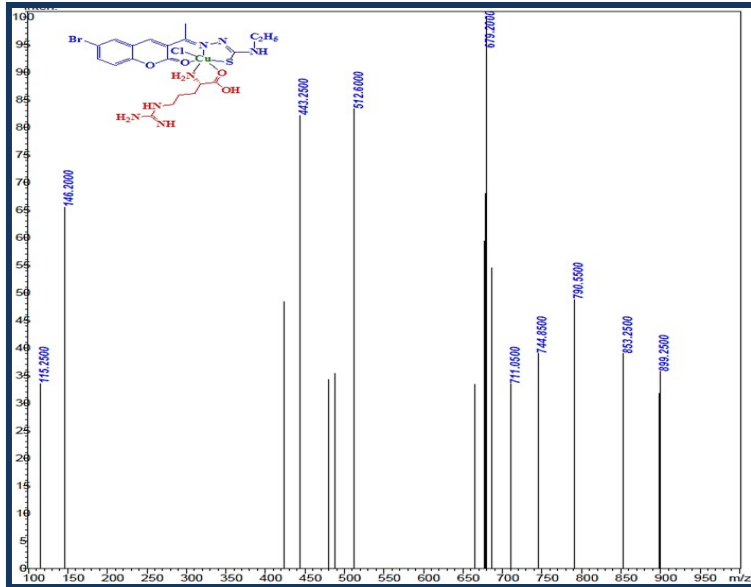

Fig.S29 Mass spectrum of RR1-Cu<sup>2+</sup>-L-arginine.

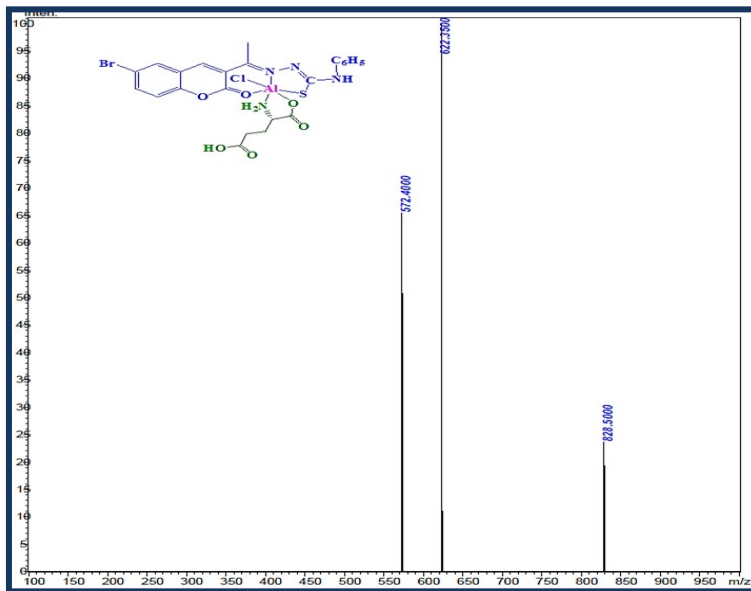

Fig.S30 Mass spectrum of RR2-Al<sup>3+</sup>-L-glutamic acid

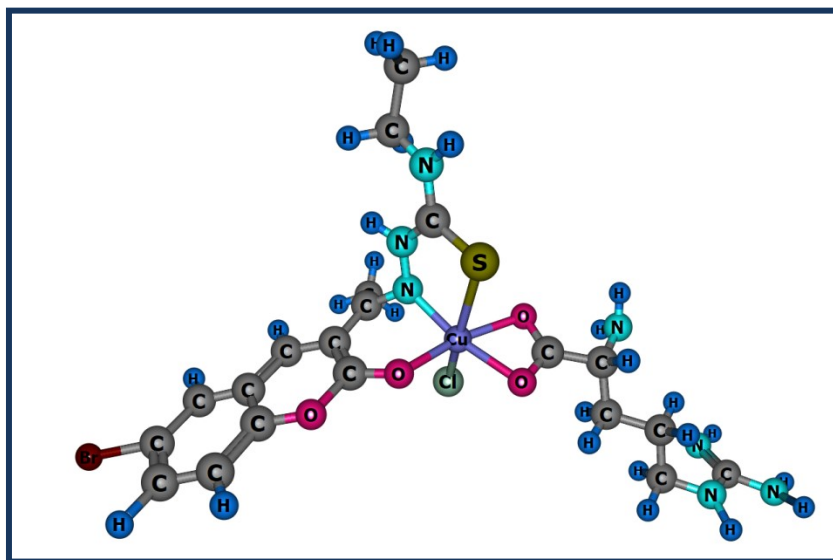

Fig.S31 Optimized structure of the RR2-Cu<sup>2+</sup>-L-Arginine (B).

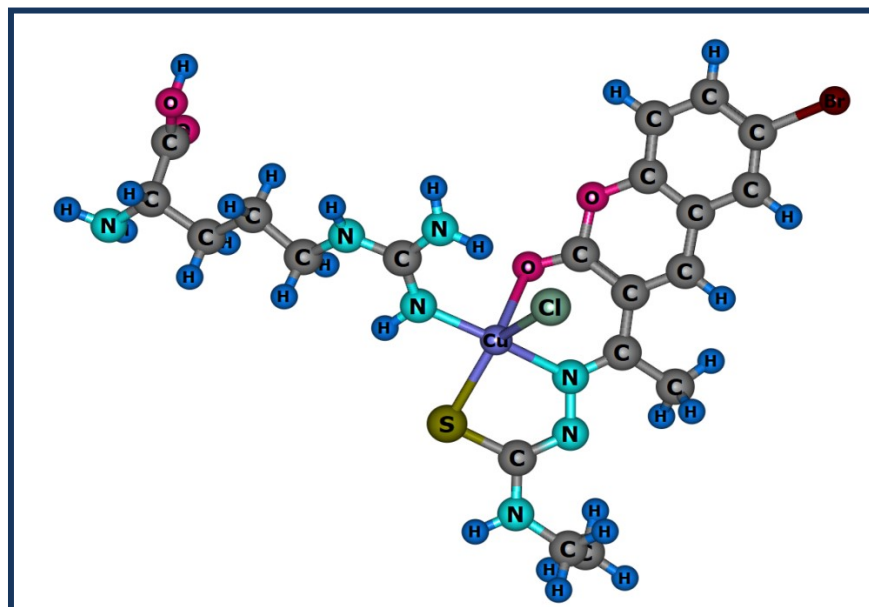

Fig.S32 Optimized structure of the RR2-Cu<sup>2+</sup>-L-Arginine (C).

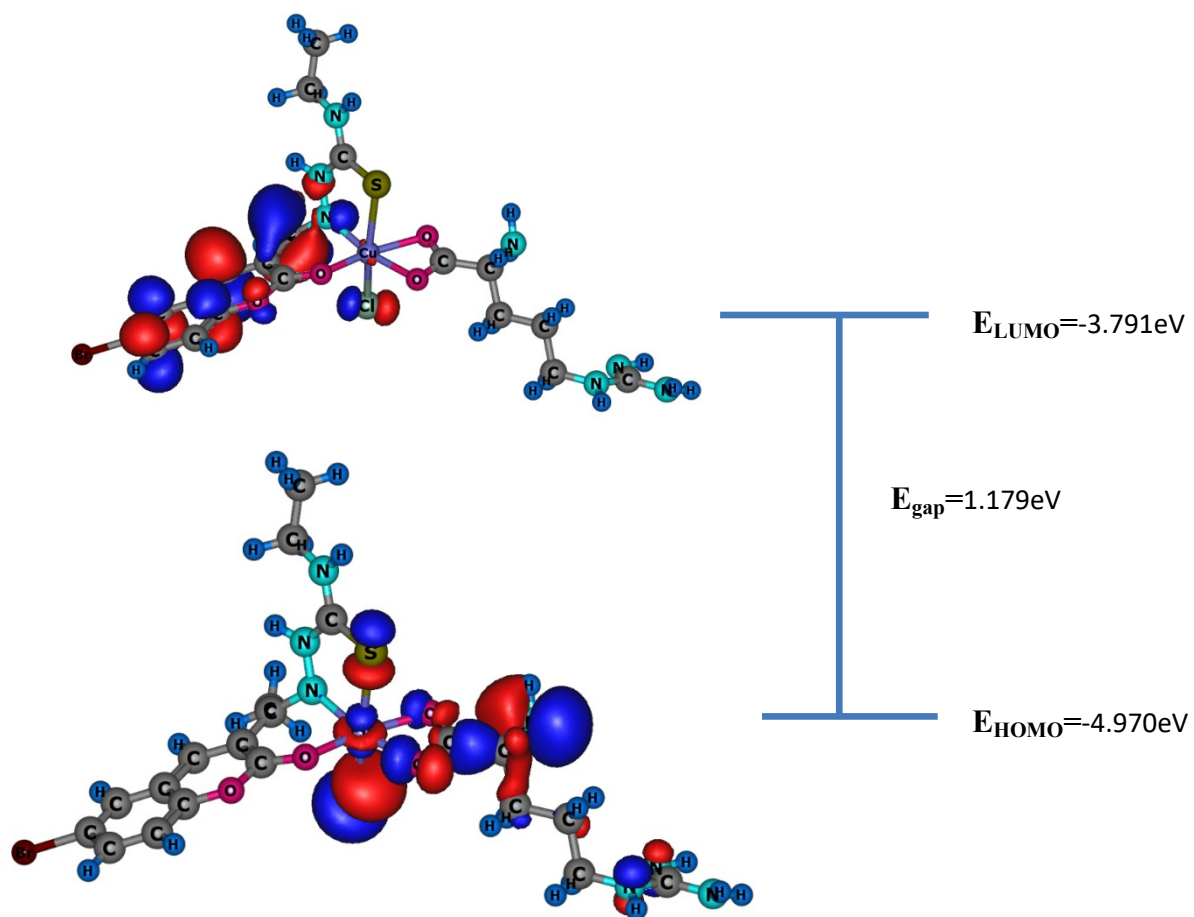

Fig. S33 HOMO-LUMO energy levels of RR1-Cu<sup>2+</sup>-L-Arginine complex were calculated from Hartree level of theory (B).

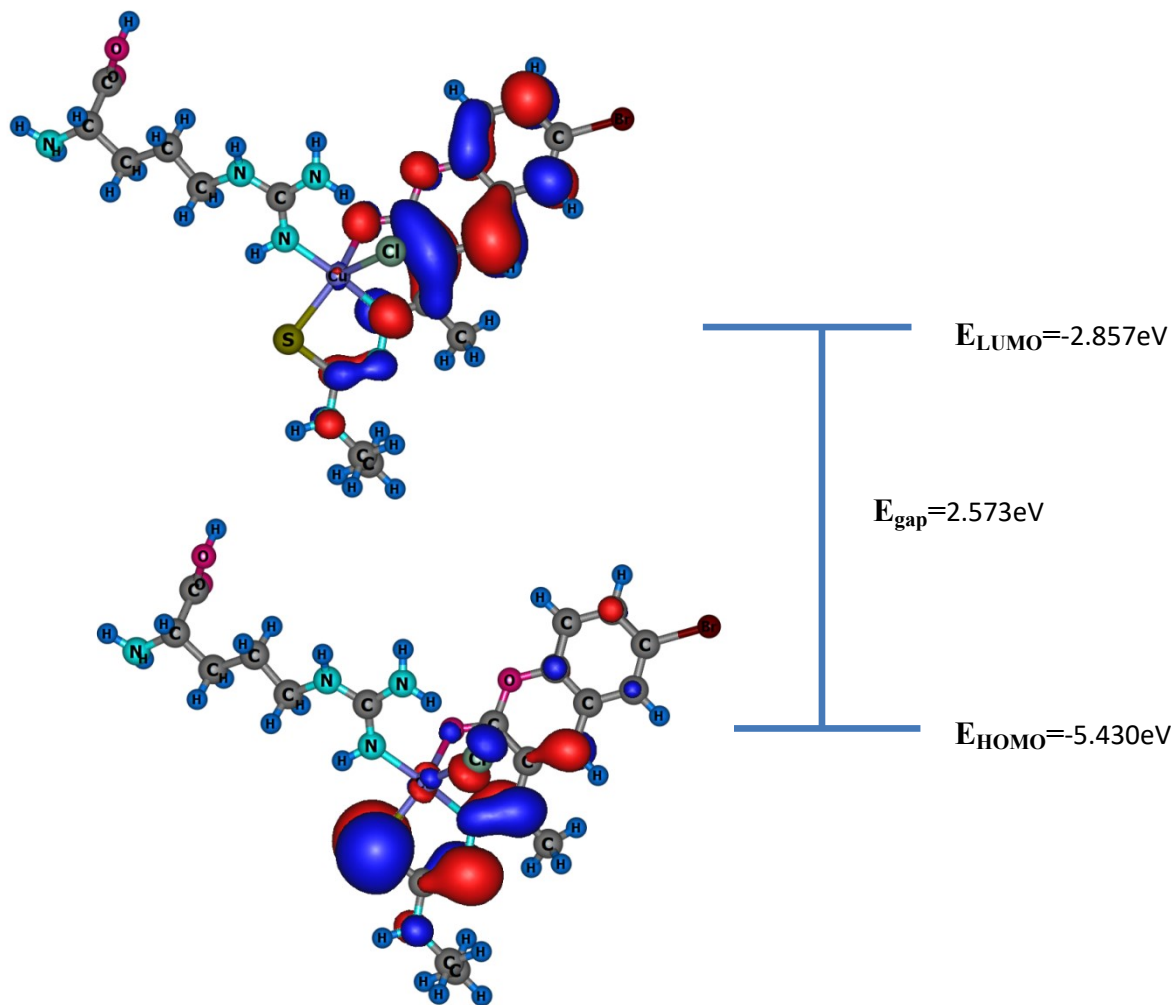

Fig. S34 HOMO-LUMO energy levels of RR1-Cu<sup>2+</sup>-L-Arginine complex were calculated from Hartree level of theory (C).

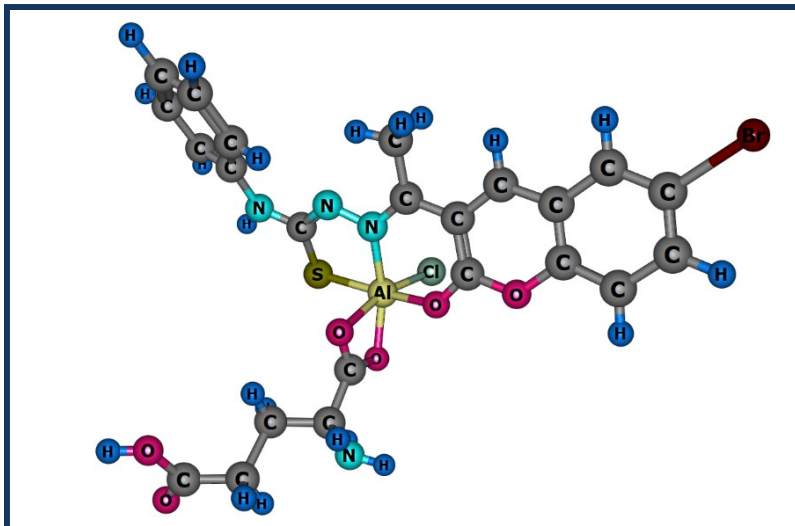

Fig.S35 Optimized structure of the RR2-Al<sup>3+</sup>-L-Glutamic acid (E).

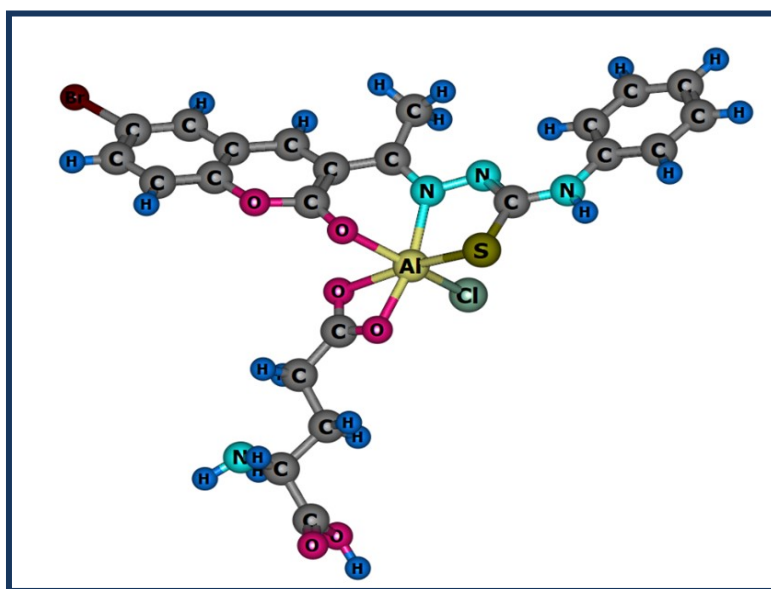

Fig.S36 Optimized structure of the RR2-Al<sup>3+</sup>-L-Glutamic acid (F).



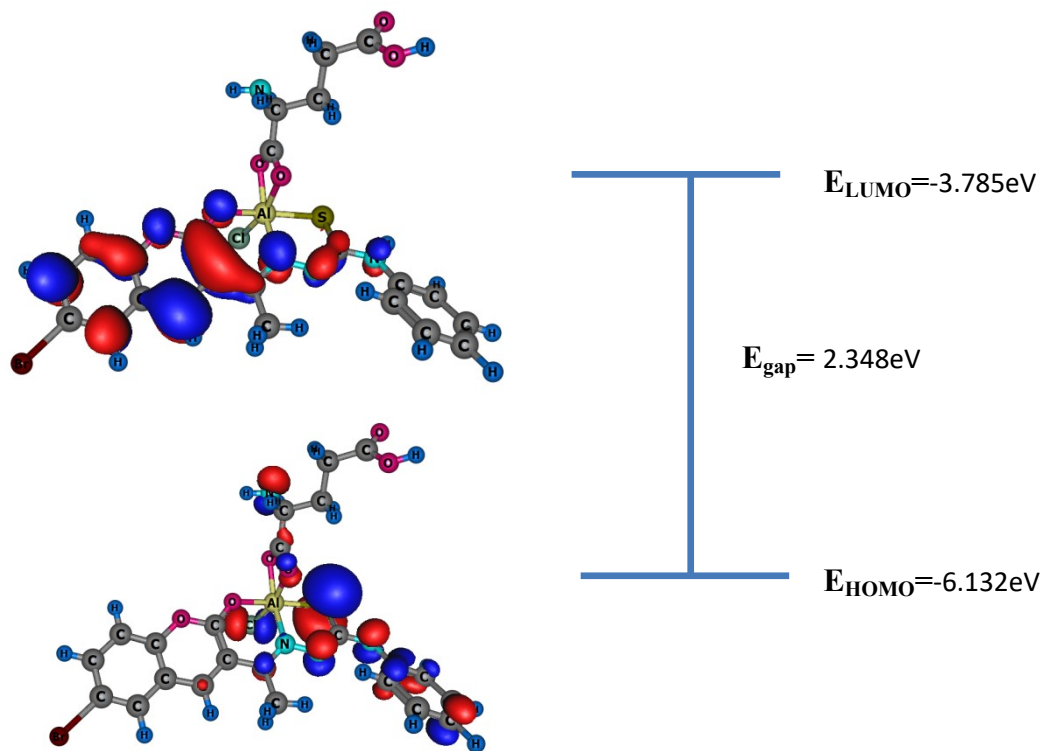

**Fig.S37 HOMO-LUMO energy levels of RR2-Al<sup>3+</sup>- L-Glutamic acid complex were calculated from Hartree level of theory (E).**

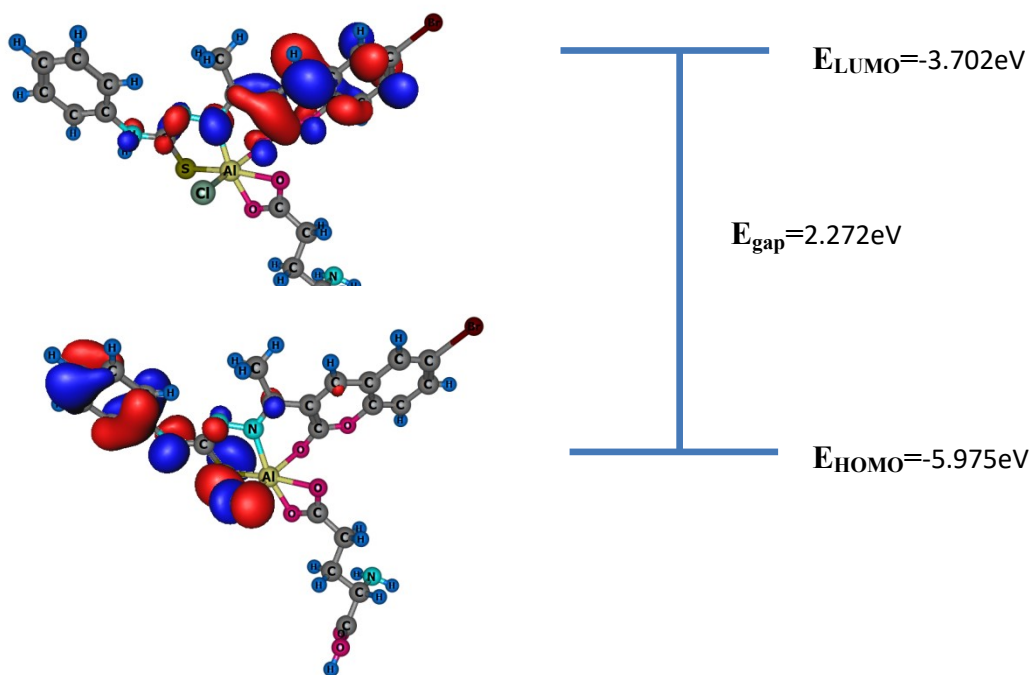

Fig. S38 HOMO-LUMO energy levels of RR2-Al<sup>3+</sup>-L-Glutamic acid complex were calculated from Hartree level of theory (F).

Table S2. Minimum energy (in Hartree) of the stable structures.

| Compound                                  | Energy (Hartree) | Relative energy (kcal/mol) |
|-------------------------------------------|------------------|----------------------------|
| RR2-Al <sup>3+</sup>                      | -1063.628        | 0                          |
| RR2-Al <sup>3+</sup> -L-Glutamic acid     | -1599.657        |                            |
| RR2-Al <sup>3+</sup> -L-Glutamic acid (1) | -1599.627        | 18.83                      |
| RR2-Al <sup>3+</sup> -L-Glutamic acid (2) | -1599.616        | 27.73                      |
| RR1-Cu <sup>2+</sup>                      | -1105.875        | 0                          |
| RR1-Cu <sup>2+</sup> -L-Arginine          | -1696.740        |                            |
| RR1-Cu <sup>2+</sup> -L-Arginine (1)      | -1696.646        | 58.99                      |
| RR1-Cu <sup>2+</sup> -L-Arginine (2)      | -1696.634        | 66.52                      |

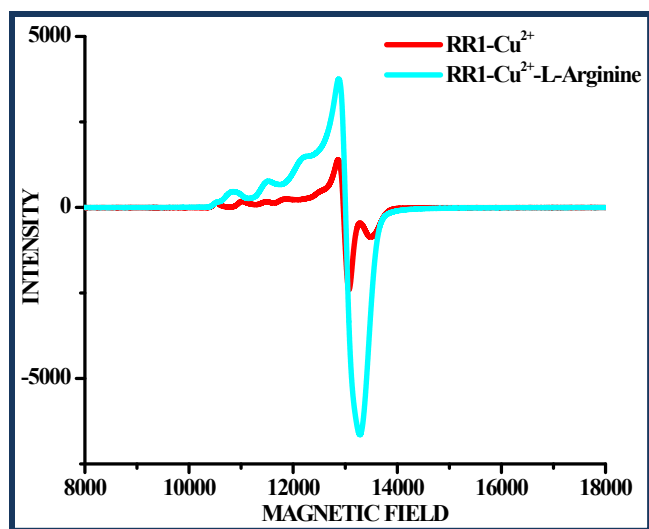

Fig. S39 EPR spectra of RR1-Cu<sup>2+</sup> and RR1-Cu<sup>2+</sup>-L-arginine (at 77K).

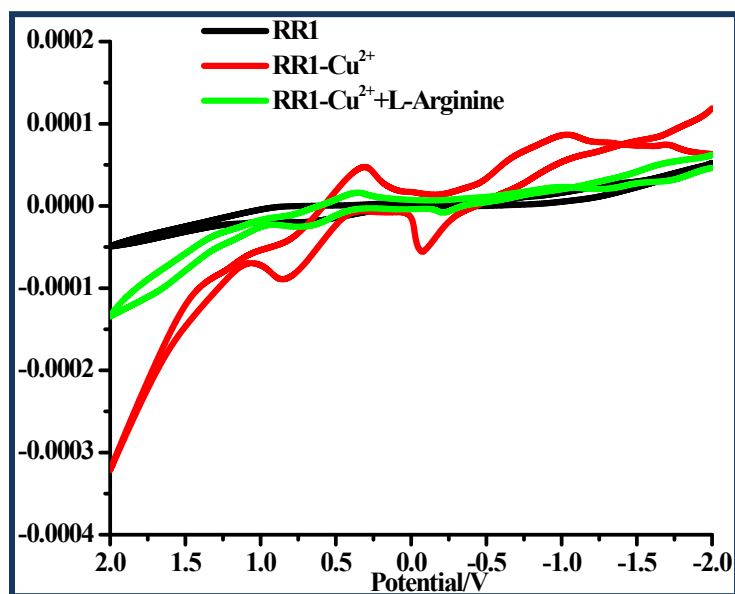

Fig. S40 Cyclic Voltammograms of RR1, RR1-Cu<sup>2+</sup> and RR1-Cu<sup>2+</sup>-L-arginine.

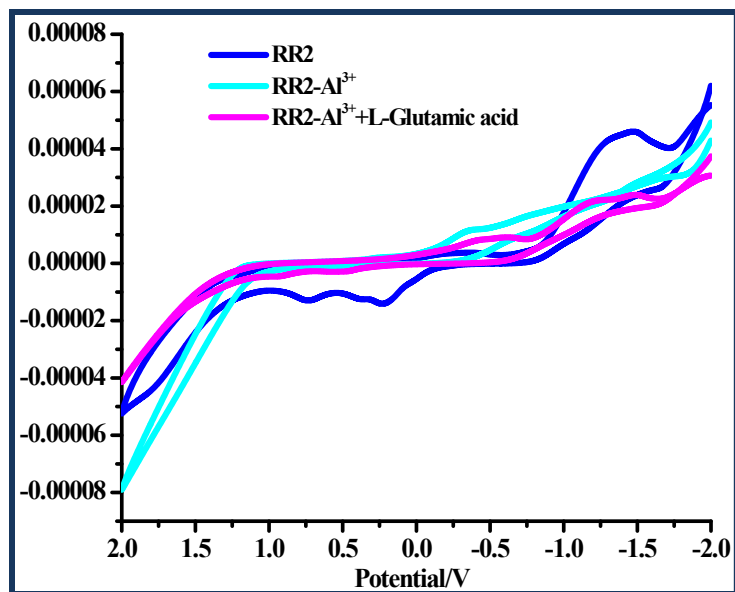

Fig.S41 Cyclic Voltammograms of RR2, RR2-Al<sup>3+</sup> and RR2-Al<sup>3+</sup>-L-glutamic acid.

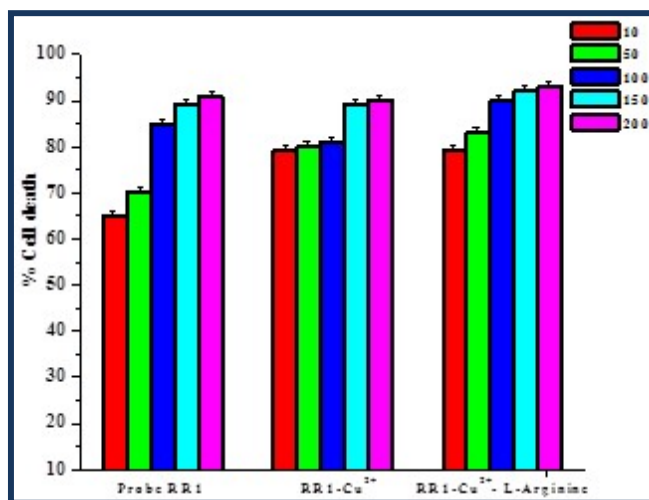

Fig. S42 MDA-MB-231 cells were treated with different concentrations of probe RR1; RR1-Cu<sup>2+</sup> and RR1-Cu<sup>2+</sup>-L-arginine.

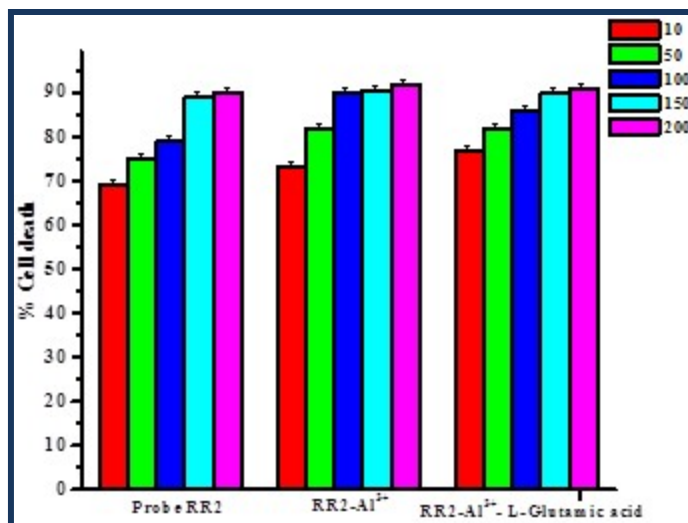

**Fig. S43**MDA-MB-231 cells were treated with different concentrations of probe **RR2**; **RR2-Al<sup>3+</sup>** and **RR2-Al<sup>3+</sup>-L-glutamic acid**.

## References

1. A. I. Vogel, *Textbook of Practical Organic Chemistry*, 5<sup>th</sup> ed., Longman, London, 1989, **268**
2. SAINT V8.34A Bruker AXS Inc, Madison, WI, 2013.
3. G. M. Sheldrick, *Acta Cryst.*, 2015, **A71**, 3.
4. G. M. Sheldrick, *Acta Cryst.*, 2015, **C91**, 9.
5. A. L. Spek, *Acta Cryst.*, 2009, **D65**, 148-155.
6. L. J. Farrugia, *J. Appl. Cryst.*, 1999, **32**, 837.
7. O. V. Dolomanov, L. J. Bourhis, R. J. Gildea, J. A. K. Howard and H. Puschmann, *J. Appl. Cryst.*, 2009, **42**, 339-341.
8. S. Brenner *Genetics*, 1974, **77**, 71.
9. T. Stiernagle, *Maintenance of C. elegans*, *WormBook*. 2006.
10. C. Elamathi, R.J. Butcher, A. Mohankumar, P. Sundararaj, A. Madankumar, P. Kalavani, R. Prabhakaran, *Inorg. Chem. Front.*, 2019, **6**, 3237.
11. A. Kalaiarasi, C. Anusha, R. Sankar, S. Rajasekaran, J. John Marshal, K. Muthusamy, V. Ravikumar, *J. Agric. Food Chem.*, 2016, **64**, 9542-9550.

12. A. Chidambaram, A. Sekar, R.K. Chidambaram, K. Arunachalam, R. Vilwanathan,  
*Investigational New Drugs*, 2017,**35(6)**, 691-705.
